# Supplementary material for: Higher Prevalence of Hypertension among Individuals with Restless Legs Syndrome: A Meta-Analysis
Source: PubMed Central journal article supplement — Psychiatry Investig. 2018 Jun 15;15(7):701–9. doi: 10.30773/pi.2018.02.26 (PMC6056689; doi:10.30773/pi.2018.02.26), 2018-06-15
Supplement: pi-2018-02-26-suppl.pdf [file pi-2018-02-26-suppl.pdf]

**Supplementary Table 1.** Methodological quality of the studies, as assessed by the Newcastle-Ottawa scale

| Cohort study                         | Selection                               |                                    |                              |                                     | Comparability control<br>for important factor | Outcome               |                  |                       | Total score<br>(0–9) |
|--------------------------------------|-----------------------------------------|------------------------------------|------------------------------|-------------------------------------|-----------------------------------------------|-----------------------|------------------|-----------------------|----------------------|
|                                      | Representativeness<br>of exposed cohort | Selection of<br>non-exposed cohort | Ascertainment<br>of exposure | Presentation<br>of outcome at start |                                               | Assessment of outcome | Enough follow-up | Adequate follow-up    |                      |
| Van Den Eeden <sup>25</sup>          | 1                                       | 1                                  | 1                            | 1                                   | 1                                             | 1                     | 1                | 1                     | 8                    |
| Cross-sectional study                | Selection                               |                                    |                              |                                     | Comparability control<br>for important factor | Outcome               |                  | Total score<br>(0–10) |                      |
|                                      | Representativeness<br>of the sample     | Sample size                        | Non-respondents              | Ascertainment<br>of the exposure    |                                               | Assessment of outcome | Statistical test |                       |                      |
| Catzin-Kuhlmann et al. <sup>16</sup> | 1                                       | 1                                  | 0                            | 1                                   | 2                                             | 1                     | 1                | 7                     |                      |
| Chen et al. <sup>17</sup>            | 0                                       | 0                                  | 0                            | 1                                   | 1                                             | 1                     | 1                | 4                     |                      |
| Giannini et al. <sup>18</sup>        | 0                                       | 0                                  | 0                            | 2                                   | 1                                             | 1                     | 1                | 5                     |                      |
| Szentkirályi et al. <sup>24</sup>    | 0                                       | 0                                  | 0                            | 2                                   | 2                                             | 1                     | 1                | 6                     |                      |
| Ulfberg et al. <sup>19</sup>         | 0                                       | 0                                  | 0                            | 1                                   | 2                                             | 1                     | 1                | 5                     |                      |
| Wesstrom et al. <sup>20</sup>        | 0                                       | 0                                  | 0                            | 1                                   | 2                                             | 1                     | 1                | 5                     |                      |
| Winter et al., male <sup>21</sup>    | 1                                       | 1                                  | 0                            | 1                                   | 2                                             | 1                     | 1                | 7                     |                      |
| Winter et al., female <sup>22</sup>  | 1                                       | 1                                  | 0                            | 1                                   | 2                                             | 1                     | 1                | 7                     |                      |
